# Supplementary material for: Exploration of charge transfer and absorption spectra of porphyrin–polyoxometalate hybrids to search for high performance sensitizers
Source: Royal Society of Chemistry journal article supplement (doi:10.1039/c5ra17343d), 2015-01-01
Supplement: c5ra17343d1.pdf [file c5ra17343d1.pdf]

# Exploration on charge transfer and absorption spectra of porphyrin-polyoxometalate hybrids for searching high performance sensitizers

Hanni Wu, Ting Zhang, Likai Yan\*, Zhongmin Su\*

*Institute of Functional Material Chemistry, Key Laboratory of Polyoxometalate Science of Ministry of Education, Faculty of Chemistry, Northeast Normal University, Changchun 130024, P. R. China*

\*Corresponding authors: Phone: +86-431-85099108. Fax: +86-431-85684009.

E-mail addresses: yanlk924@nenu.edu.cn (L.-K. Yan), zmsu@nenu.edu.cn (Z.-M. Su).

## Supporting Information

**Fig. S1.** LUMO distributions and energy levels of systems 2-4.

**Table S1.** The orbital composition of LUMO for systems 1-4.

**Table S2.** Optimized Cartesian coordinates for systems 1-4.

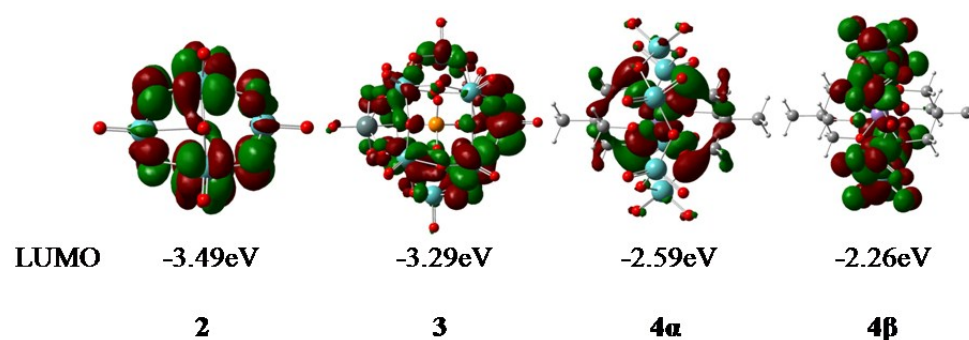

**Fig. S1.** LUMO distributions and energy levels of systems 2-4.

**Table S1.** The orbital composition of LUMO for systems 1-4.

| System | Orbital composition of LUMO |
|--------|-----------------------------|
| 1      | 80% p(C)+6% p(N)            |
| 2      | 63% d(Mo)+33% p(O)          |
| 3      | 69% d(Mo)+19% p(O)          |
| 4      | 80% p(C)+6% p(N)            |

**Table S2.** Optimized Cartesian coordinates for systems **1-4**.

System **1** C<sub>43</sub>H<sub>26</sub>O<sub>2</sub>N<sub>4</sub> (B3LYP/6-31G\*)

| Atom | X           | Y           | Z           |
|------|-------------|-------------|-------------|
| N    | -0.46697400 | -1.50999500 | -0.04909300 |
| N    | -0.48088000 | 1.45667400  | -0.03802100 |
| C    | -0.72028500 | -2.86561300 | -0.01812000 |
| C    | 0.55609400  | -3.51587100 | 0.03392200  |
| C    | 1.52823200  | -2.54960400 | 0.02606800  |
| C    | 0.88336600  | -1.27423100 | -0.02077300 |
| C    | 1.51736400  | -0.01009200 | -0.01518900 |
| C    | 0.86388700  | 1.25240100  | -0.01145800 |
| C    | 1.59339900  | 2.51106900  | 0.04055600  |
| C    | 0.65668800  | 3.49040400  | 0.04940300  |
| C    | -0.63860100 | 2.82083000  | -0.00705400 |
| C    | -1.98685200 | -3.47575800 | -0.01312800 |
| C    | -2.01084000 | -4.97369800 | -0.00724600 |
| C    | -1.54568600 | -5.70232000 | -1.11383400 |
| C    | -2.28685600 | 7.13245000  | 1.09622200  |
| C    | -1.34436100 | 7.11008100  | -1.12757400 |
| C    | -2.49677500 | -5.67684400 | 1.10697100  |
| H    | 0.69930400  | -4.58484900 | 0.07954800  |
| H    | 2.59847800  | -2.69054500 | 0.06150600  |
| H    | 2.66899100  | 2.61254400  | 0.07632300  |

|   |             |             |             |
|---|-------------|-------------|-------------|
| H | 0.81511100  | 4.55785000  | 0.09895700  |
| H | -1.17450100 | -5.17047700 | -1.98539200 |
| H | -0.97237700 | 7.63922900  | -2.00059900 |
| H | -2.85151900 | -5.12488600 | 1.97275300  |
| N | -3.38613900 | 1.54543300  | 0.02995900  |
| C | -3.13494800 | 2.90050900  | 0.00169300  |
| C | -4.41187400 | 3.55009000  | -0.04917700 |
| C | -5.38324900 | 2.58307100  | -0.04424500 |
| C | -4.73703300 | 1.30778000  | -0.00012100 |
| C | -5.36833300 | 0.04567600  | -0.00950400 |
| C | -4.71850000 | -1.21462000 | -0.01126500 |
| N | -3.37221100 | -1.42107200 | 0.01836600  |
| C | -1.86792700 | 3.51162000  | -0.00283900 |
| C | -1.84542600 | 5.00971700  | -0.00723300 |
| C | -2.30863200 | 5.73667400  | 1.10123000  |
| C | -1.36337700 | 5.71448000  | -1.12207000 |
| H | -1.01023900 | 5.16372100  | -1.98927200 |
| H | -2.67704700 | 5.20356700  | 1.97320300  |
| C | -3.21680000 | -2.78365300 | -0.01103900 |
| C | -4.51271900 | -3.45283200 | -0.06935100 |
| C | -5.44880000 | -2.47297700 | -0.06367000 |
| H | -6.52450000 | -2.57239900 | -0.10126700 |
| H | -4.67158000 | -4.52026400 | -0.11798100 |
| C | -1.56923000 | -7.09805800 | -1.10757400 |
| C | -2.51746400 | -7.07239300 | 1.11374700  |
| H | -2.89234000 | -7.60025500 | 1.98631000  |
| H | -1.21134300 | -7.64565200 | -1.97509200 |
| H | -6.45381500 | 2.72173400  | -0.07914300 |
| H | -4.55568300 | 4.61911400  | -0.09195000 |

|   |             |             |             |
|---|-------------|-------------|-------------|
| H | -2.07181800 | -8.87333800 | 0.01144300  |
| H | -1.78939100 | 8.90942100  | -0.02241900 |
| C | -1.80528700 | 7.82310400  | -0.01825800 |
| C | -2.05452800 | -7.78704800 | 0.00630000  |
| H | -2.66511200 | 0.83147700  | 0.05144900  |
| H | -1.18714700 | -0.79517000 | -0.07217600 |
| H | -2.64320900 | 7.67879300  | 1.96516100  |
| C | -8.00949000 | 0.08077200  | -0.04900800 |
| C | -6.79783200 | 0.05923700  | -0.03169400 |
| C | 2.93849800  | -0.02269400 | -0.00056400 |
| C | 4.15732300  | -0.04300800 | 0.00887900  |
| C | 5.57796200  | -0.06323000 | 0.01957800  |
| C | 6.31258500  | 1.14269300  | 0.03481200  |
| C | 6.27851600  | -1.29008200 | 0.01518400  |
| C | 7.70104300  | 1.12130500  | 0.04581500  |
| H | 5.78239600  | 2.08947500  | 0.03787800  |
| C | 7.66552300  | -1.30361500 | 0.02651100  |
| H | 5.72238600  | -2.22179800 | 0.00260700  |
| C | 8.39022100  | -0.10186300 | 0.04201200  |
| H | 8.25473300  | 2.05322000  | 0.05757400  |
| H | 8.20693600  | -2.24359100 | 0.02345800  |
| C | 9.87285300  | -0.17595800 | 0.05392400  |
| O | 10.51524200 | -1.21239000 | 0.05249300  |
| O | 10.46524900 | 1.03964000  | 0.06674800  |
| H | 11.42884100 | 0.88468700  | 0.07361400  |
| H | -9.07715500 | 0.09571500  | -0.06392700 |

---

System 2 [C<sub>43</sub>H<sub>25</sub>O<sub>2</sub>N<sub>4</sub>(Mo<sub>6</sub>O<sub>18</sub>N)]<sup>2-</sup> (B3LYP/6-31G\*/LanL2DZ)

---

| Atom | X | Y | Z |
|------|---|---|---|
|------|---|---|---|

---

---

|    |             |             |             |
|----|-------------|-------------|-------------|
| Mo | 8.31290500  | -0.12956500 | 0.06208200  |
| Mo | 5.91355300  | -1.79126100 | -1.57272700 |
| Mo | 3.73743400  | 0.12982600  | -0.02301600 |
| Mo | 5.84418900  | -1.59103500 | 1.80681200  |
| Mo | 6.09661600  | 1.58646800  | -1.77228400 |
| Mo | 6.02947300  | 1.79201500  | 1.60625700  |
| O  | 5.91743600  | 0.00113600  | 0.01613500  |
| O  | 7.78119600  | -1.41972400 | 1.33742700  |
| O  | 5.95582300  | -2.73157200 | -0.01372400 |
| O  | 7.89445100  | 1.34485200  | -1.20769900 |
| O  | 7.83202700  | -1.30819900 | -1.34434400 |
| O  | 7.84107900  | 1.23568100  | 1.42219800  |
| O  | 5.93558700  | -0.03859500 | 2.74939400  |
| O  | 4.11134400  | -1.28258600 | -1.42694200 |
| O  | 4.12952600  | 1.34936000  | 1.41705300  |
| O  | 6.02013000  | 2.73642700  | 0.05153700  |
| O  | 6.03530800  | 0.03123400  | -2.71501700 |
| O  | 5.84275600  | -2.86592800 | 2.95119200  |
| O  | 4.18237200  | 1.45907100  | -1.33824300 |
| O  | 4.05332200  | -1.38900900 | 1.28403800  |
| O  | 6.05448600  | 2.93581300  | 2.88124300  |
| O  | 5.96513500  | -2.94062700 | -2.84199700 |
| O  | 10.02182200 | -0.14756000 | 0.09018500  |
| O  | 6.17149800  | 2.85897000  | -2.91654600 |
| N  | 1.93588900  | 0.14914600  | -0.04848800 |
| N  | -6.88924500 | -1.50665300 | 0.01511400  |
| N  | -6.88755400 | 1.45898100  | 0.00484500  |
| C  | -6.63203300 | -2.85973000 | -0.02030700 |
| C  | -7.90397000 | -3.51650600 | -0.06010400 |

|   |              |             |             |
|---|--------------|-------------|-------------|
| C | -8.88149500  | -2.55376300 | -0.04015800 |
| C | -8.24143500  | -1.27719100 | 0.00168300  |
| C | -8.88076500  | -0.01457700 | 0.00402600  |
| C | -8.23287400  | 1.25023200  | -0.00791600 |
| C | -8.96694900  | 2.50571600  | -0.05482600 |
| C | -8.03274800  | 3.48814500  | -0.07510100 |
| C | -6.73573600  | 2.82171100  | -0.02961600 |
| C | -5.35975200  | -3.46714700 | -0.03763300 |
| C | -5.33396300  | -4.96499200 | -0.04545200 |
| C | -5.78750400  | -5.69506000 | 1.06531900  |
| C | -5.10967400  | 7.13870200  | -1.15022200 |
| C | -6.04274100  | 7.11386800  | 1.07840100  |
| C | -4.85773400  | -5.66539900 | -1.16576500 |
| H | -8.04247200  | -4.58596100 | -0.10587100 |
| H | -9.95134400  | -2.69940800 | -0.06425300 |
| H | -10.04303700 | 2.60376500  | -0.08026200 |
| H | -8.19456000  | 4.55490300  | -0.12549700 |
| H | -6.15075900  | -5.16486900 | 1.94116400  |
| H | -6.41280900  | 7.64214900  | 1.95269900  |
| H | -4.51222800  | -5.11167200 | -2.03406300 |
| N | -3.97745900  | 1.55810000  | -0.09340100 |
| C | -4.23805200  | 2.91397000  | -0.06150700 |
| C | -2.96473300  | 3.57104900  | -0.02007900 |
| C | -1.98741400  | 2.60957000  | -0.03435600 |
| C | -2.62781500  | 1.33211900  | -0.07488100 |
| C | -1.98577900  | 0.06658400  | -0.07273000 |
| C | -2.63970600  | -1.20237800 | -0.06457000 |
| N | -3.97989900  | -1.40692000 | -0.08179600 |
| C | -5.50639500  | 3.51771400  | -0.04559400 |

|   |              |             |             |
|---|--------------|-------------|-------------|
| C | -5.53635600  | 5.01523900  | -0.04252100 |
| C | -5.08077500  | 5.74278000  | -1.15410100 |
| C | -6.01781800  | 5.71817500  | 1.07412800  |
| H | -6.36439000  | 5.16659100  | 1.94337100  |
| H | -4.71330800  | 5.21053600  | -2.02689300 |
| C | -4.13497000  | -2.77501900 | -0.05108500 |
| C | -2.83697800  | -3.44071000 | -0.00479000 |
| C | -1.90367400  | -2.45824800 | -0.01886900 |
| H | -0.82733700  | -2.55767800 | 0.00943100  |
| H | -2.67486600  | -4.50752700 | 0.04276100  |
| C | -5.76115100  | -7.09095100 | 1.05713800  |
| C | -4.83496400  | -7.06123600 | -1.17427400 |
| H | -4.46750800  | -7.58744100 | -2.05090900 |
| H | -6.10882600  | -7.64024100 | 1.92767800  |
| H | -0.91764000  | 2.75772200  | -0.00741300 |
| H | -2.82635100  | 4.64061400  | 0.02388700  |
| H | -5.26626800  | -8.86407200 | -0.06914100 |
| H | -5.61049500  | 8.91422900  | -0.03055700 |
| C | -5.58978700  | 7.82802700  | -0.03395100 |
| C | -5.28567200  | -7.77785500 | -0.06274400 |
| H | -4.69248900  | 0.83798100  | -0.10932100 |
| H | -6.17268000  | -0.78809700 | 0.03210600  |
| H | -4.75940900  | 7.68591100  | -2.02100700 |
| C | 0.65680200   | 0.11295100  | -0.05771200 |
| C | -0.57860000  | 0.08314100  | -0.06480100 |
| C | -10.30130300 | -0.03278500 | 0.00773200  |
| C | -11.52006100 | -0.05721700 | 0.01572800  |
| C | -12.94061800 | -0.08069400 | 0.02700700  |
| C | -13.67719200 | 1.12443600  | 0.02454600  |

|   |              |             |            |
|---|--------------|-------------|------------|
| C | -13.63811400 | -1.30949400 | 0.04175200 |
| C | -15.06595000 | 1.10029200  | 0.03661000 |
| H | -13.14873000 | 2.07208800  | 0.01342200 |
| C | -15.02546600 | -1.32553000 | 0.05364100 |
| H | -13.07988700 | -2.23999800 | 0.04419100 |
| C | -15.75212600 | -0.12466200 | 0.05124100 |
| H | -15.62179700 | 2.03096200  | 0.03474400 |
| H | -15.56539300 | -2.26625200 | 0.06511300 |
| C | -17.23520700 | -0.20153100 | 0.06481600 |
| O | -17.87476500 | -1.23979200 | 0.07763900 |
| O | -17.82976500 | 1.01229700  | 0.06168400 |
| H | -18.79339900 | 0.85586900  | 0.07116700 |

System 3 [C<sub>43</sub>H<sub>25</sub>O<sub>2</sub>N<sub>4</sub>(PSnMo<sub>11</sub>O<sub>39</sub>)]<sup>4+</sup> (B3LYP/6-31G\*/ LanL2DZ)

| Atom | X           | Y           | Z           |
|------|-------------|-------------|-------------|
| P    | -3.76256000 | -0.00887000 | 0.04393800  |
| Mo   | -2.15770700 | 1.75376300  | -2.76112400 |
| Mo   | -5.22329400 | -1.88551900 | 2.75967600  |
| Mo   | -5.85903400 | 2.00413800  | -2.10412000 |
| Mo   | -7.33549500 | -0.14565500 | 0.23458600  |
| Mo   | -4.03225100 | -3.64048200 | -0.04628000 |
| Mo   | -2.08440000 | -1.77316000 | -2.68727300 |
| Mo   | -5.32471900 | 1.91953400  | 2.69831400  |
| Mo   | -1.79299400 | -2.16392000 | 2.18559900  |
| Mo   | -3.54046400 | 3.66456800  | 0.29089800  |
| Mo   | -5.83729700 | -1.47397500 | -2.60033800 |
| Mo   | -1.84300900 | 1.56752800  | 2.58924100  |
| O    | -1.60970900 | -2.73457300 | -4.01761700 |
| O    | -3.67381400 | 1.23046100  | 0.97734100  |



|   |             |             |             |
|---|-------------|-------------|-------------|
| O | -3.71441800 | -1.32585500 | 0.87213000  |
| O | -2.51160500 | 0.01088400  | -0.92003200 |
| O | -6.30553000 | 2.44355600  | 3.99821900  |
| O | -4.02534500 | -5.30795600 | -0.42764500 |
| O | -0.68334300 | -2.85673200 | 3.28634800  |
| O | -5.20723700 | 3.12531100  | -0.82559900 |
| O | -2.60224100 | 3.07055800  | -1.15121800 |
| O | -3.47196900 | -2.32064600 | 3.27804400  |
| O | -5.00578900 | 3.45746500  | 1.75227800  |
| O | -8.98791400 | -0.14796600 | 0.66916200  |
| O | -4.03939600 | -1.52654900 | -3.08038900 |
| O | -6.21270200 | 0.20286100  | -3.19300100 |
| O | -6.17821200 | -2.64122400 | 3.96132700  |
| O | -2.36820200 | -3.59747800 | 1.18282700  |
| O | -0.75915100 | 1.36227100  | 1.10074900  |
| O | -6.63418300 | 3.04974000  | -3.21529000 |
| O | -4.10102000 | 1.80198200  | -2.84137100 |
| O | -0.71549800 | -1.39727500 | 0.91157200  |
| O | -3.58031100 | 1.93804800  | 3.46543700  |
| O | -1.73156500 | 2.87275000  | -3.98113200 |
| O | -1.90254600 | -0.22006600 | 2.95843400  |
| O | -7.31517500 | 1.35159800  | -1.07047100 |
| O | -6.59454600 | -2.49449000 | -3.74563900 |
| O | -7.30223700 | -1.29630500 | -1.25760800 |
| O | -0.78753700 | 2.21771700  | 3.77091500  |
| O | -3.59636500 | 5.36415000  | 0.09286400  |
| O | -2.34126700 | 3.41906500  | 1.63935200  |
| O | -6.58667100 | 1.19193100  | 1.47634600  |
| O | -5.02108100 | -3.55266500 | 1.49119000  |

|   |             |             |             |
|---|-------------|-------------|-------------|
| O | -2.60935200 | -2.96870800 | -1.40054100 |
| O | -6.58524900 | -1.42169000 | 1.38838100  |
| O | -0.47831500 | -1.27497700 | -1.92946600 |
| O | -5.06419700 | 0.04466000  | -0.79599800 |
| O | -2.06872600 | 0.11369500  | -3.58615800 |
| O | -5.23259900 | -2.91949400 | -1.21189100 |
| O | -0.56507300 | 1.54435100  | -1.81945700 |
| O | -5.21190900 | -0.13983300 | 3.23467400  |
| N | 9.30257100  | 1.53455700  | 0.01357000  |
| N | 9.22383400  | -1.43035300 | -0.00047800 |
| C | 9.07912800  | 2.89565100  | -0.01858500 |
| C | 10.37013400 | 3.51866900  | -0.03446200 |
| C | 11.32118800 | 2.53134300  | -0.00583900 |
| C | 10.64800900 | 1.26995500  | 0.01916900  |
| C | 11.25453100 | -0.00788800 | 0.02625400  |
| C | 10.57294200 | -1.25574500 | 0.00740200  |
| C | 11.27562600 | -2.53043400 | -0.02269700 |
| C | 10.31767600 | -3.48916600 | -0.05296000 |
| C | 9.03645800  | -2.79079000 | -0.03226700 |
| C | 7.82638200  | 3.53319500  | -0.05613800 |
| C | 7.83562300  | 5.03128400  | -0.05622400 |
| C | 8.28913500  | 5.74515900  | 1.06513300  |
| C | 7.32421500  | -7.07089500 | -1.16683700 |
| C | 8.20657600  | -7.05928000 | 1.08216500  |
| C | 7.39409400  | 5.74966400  | -1.17955400 |
| H | 10.53692600 | 4.58449100  | -0.07174900 |
| H | 12.39476700 | 2.64902600  | -0.01249500 |
| H | 12.34925100 | -2.65548100 | -0.03006400 |
| H | 10.45351400 | -4.55999100 | -0.09554900 |

|   |            |             |             |
|---|------------|-------------|-------------|
| H | 8.62527400 | 5.20163100  | 1.94364700  |
| H | 8.54219800 | -7.59253200 | 1.96735700  |
| H | 7.04824000 | 5.20924200  | -2.05609100 |
| N | 6.31914400 | -1.45610000 | -0.15317200 |
| C | 6.53980900 | -2.81639900 | -0.11517500 |
| C | 5.24808100 | -3.43860200 | -0.10908100 |
| C | 4.29819400 | -2.45060600 | -0.15190300 |
| C | 4.97340600 | -1.18966800 | -0.17337900 |
| C | 4.36874500 | 0.08654500  | -0.18853300 |
| C | 5.04777200 | 1.33222000  | -0.15815200 |
| N | 6.39836500 | 1.50903100  | -0.13912900 |
| C | 7.79282200 | -3.45479800 | -0.06990400 |
| C | 7.78282000 | -4.95298300 | -0.05995400 |
| C | 7.33391500 | -5.67471600 | -1.17806500 |
| C | 8.21886700 | -5.66332200 | 1.07056900  |
| H | 8.55992600 | -5.11643600 | 1.94500300  |
| H | 7.00062900 | -5.13761800 | -2.06160100 |
| C | 6.58224900 | 2.86796700  | -0.09860000 |
| C | 5.29985700 | 3.56540800  | -0.08098400 |
| C | 4.34321800 | 2.60612400  | -0.12567000 |
| H | 3.26917700 | 2.72851500  | -0.12666800 |
| H | 5.16226700 | 4.63569700  | -0.03197900 |
| C | 8.29773000 | 7.14138500  | 1.06424100  |
| C | 7.40538400 | 7.14564200  | -1.18084400 |
| H | 7.06417300 | 7.68507600  | -2.06010300 |
| H | 8.64533700 | 7.67740700  | 1.94310200  |
| H | 3.22420400 | -2.56607200 | -0.15832900 |
| H | 5.07964900 | -4.50409500 | -0.07027200 |
| H | 7.86364200 | 8.93203100  | -0.05961400 |

|    |             |             |             |
|----|-------------|-------------|-------------|
| H  | 7.75069400  | -8.85352500 | -0.02749600 |
| C  | 7.75988700  | -7.76715900 | -0.03665200 |
| C  | 7.85653000  | 7.84561300  | -0.05883400 |
| H  | 7.05500100  | -0.75729800 | -0.15042700 |
| H  | 8.56722700  | 0.83504100  | 0.01373600  |
| H  | 6.97875900  | -7.61305300 | -2.04275300 |
| C  | 1.71914400  | 0.10921800  | -0.27652800 |
| C  | 2.94159600  | 0.10437800  | -0.23151100 |
| C  | 12.67551600 | -0.02676300 | 0.04239100  |
| C  | 13.89462100 | -0.03396500 | 0.05676900  |
| C  | 15.31519100 | -0.04453500 | 0.07282000  |
| C  | 16.02458700 | -1.26616400 | 0.06952900  |
| C  | 16.04224700 | 1.16725300  | 0.09206600  |
| C  | 17.41344800 | -1.27438500 | 0.08517000  |
| H  | 15.47472300 | -2.20156800 | 0.05450000  |
| C  | 17.42943700 | 1.15110500  | 0.10749300  |
| H  | 15.50623700 | 2.11078200  | 0.09481400  |
| C  | 18.12873700 | -0.06610300 | 0.10426400  |
| H  | 17.94712400 | -2.21799300 | 0.08249600  |
| H  | 17.99060800 | 2.07930200  | 0.12228600  |
| C  | 19.61233800 | -0.02371300 | 0.12152300  |
| O  | 20.27681200 | 0.99904300  | 0.13844800  |
| O  | 20.17947300 | -1.25113000 | 0.11684100  |
| H  | 21.14621700 | -1.11577100 | 0.12899400  |
| Sn | -0.36796700 | 0.10479400  | -0.41551100 |

---

System 4 [C<sub>47</sub>H<sub>31</sub>O<sub>2</sub>N<sub>4</sub>[MnMo<sub>6</sub>O<sub>24</sub>[C(CH<sub>2</sub>)<sub>3</sub>]CH<sub>3</sub>]]<sup>3-</sup> (B3LYP/6-31G\*/ LanL2DZ)

---

| Atom | X          | Y           | Z          |
|------|------------|-------------|------------|
| Mo   | 4.56332100 | -1.96102200 | 2.89030900 |

---

|    |            |             |             |
|----|------------|-------------|-------------|
| Mo | 4.37734900 | 1.46916500  | 3.12720200  |
| Mo | 4.47724400 | 3.45956500  | 0.31782900  |
| Mo | 4.79100800 | 2.00622500  | -2.74658300 |
| Mo | 4.97289800 | -1.42059700 | -2.98222500 |
| Mo | 4.87179700 | -3.41326000 | -0.16689200 |
| Mn | 4.67518000 | 0.02338300  | 0.07212100  |
| O  | 3.17680200 | -2.04570300 | 3.91970800  |
| O  | 5.73496100 | -3.00603600 | 3.60623100  |
| O  | 3.84253000 | -3.00854100 | 1.42616300  |
| O  | 5.27902100 | -0.23021100 | 3.37644800  |
| O  | 5.82534600 | -1.57435400 | 0.94852200  |
| O  | 3.44439500 | -0.11519500 | 1.56899700  |
| O  | 3.04386200 | 1.32554100  | 4.21305300  |
| O  | 5.51839600 | 2.49441400  | 3.91850700  |
| O  | 3.57301900 | 2.67769000  | 1.83683600  |
| O  | 5.64743500 | 1.35990200  | 1.08593300  |
| O  | 5.67062900 | 4.43749400  | 1.09791700  |
| O  | 3.27104000 | 4.56013600  | -0.24039600 |
| O  | 5.50197300 | 3.05085800  | -1.27705500 |
| O  | 3.51104900 | 1.61801600  | -0.80282700 |
| O  | 6.17512100 | 2.09713200  | -3.77815800 |
| O  | 3.61623900 | 3.05107900  | -3.45778100 |
| O  | 4.07041400 | 0.27907900  | -3.23528800 |
| O  | 5.89780600 | 0.16260000  | -1.42539600 |
| O  | 6.30352200 | -1.28420800 | -4.07234200 |
| O  | 3.82614500 | -2.44329800 | -3.76871400 |
| O  | 5.76954600 | -2.62801100 | -1.68868700 |
| O  | 3.68630100 | -1.30925300 | -0.94206200 |
| O  | 3.67374900 | -4.38498600 | -0.94841900 |

|   |             |             |             |
|---|-------------|-------------|-------------|
| O | 6.07518000  | -4.51919200 | 0.38627400  |
| C | 2.11225400  | 1.37286500  | -0.83096500 |
| H | 1.76021800  | 1.39627000  | -1.86934700 |
| H | 1.59482300  | 2.16741400  | -0.27934800 |
| C | 2.04265600  | -0.10672900 | 1.30045800  |
| H | 1.59101200  | 0.74023000  | 1.82637900  |
| H | 1.61297300  | -1.03543500 | 1.69142100  |
| C | 2.26243300  | -1.20998000 | -0.99654400 |
| H | 1.83797100  | -2.13028800 | -0.58018900 |
| H | 1.95783000  | -1.12544800 | -2.04456800 |
| C | 7.23051900  | -1.31099900 | 0.97158100  |
| H | 7.74536800  | -2.11237300 | 0.42578000  |
| H | 7.57493800  | -1.34158900 | 2.01334800  |
| C | 7.07801300  | 1.24856600  | 1.13329400  |
| H | 7.37657200  | 1.17284100  | 2.18474400  |
| H | 7.49673900  | 2.17363400  | 0.71927100  |
| C | 7.30469500  | 0.15091000  | -1.13943600 |
| H | 7.73150000  | 1.07782900  | -1.54083600 |
| H | 7.75061700  | -0.69684500 | -1.67119400 |
| C | 7.65788400  | 0.04675100  | 0.35871000  |
| N | -7.34695700 | -1.56474600 | -0.15770000 |
| N | -7.29104700 | 1.39923000  | -0.14435600 |
| C | -7.11385700 | -2.92341500 | -0.22124900 |
| C | -8.40061000 | -3.55596700 | -0.22114700 |
| C | -9.35792100 | -2.57720700 | -0.14780500 |
| C | -8.69375100 | -1.31108300 | -0.11412000 |
| C | -9.30950600 | -0.03855900 | -0.07153100 |
| C | -8.63793000 | 1.21460600  | -0.10475200 |
| C | -9.35096900 | 2.48395100  | -0.12060800 |

|   |              |             |             |
|---|--------------|-------------|-------------|
| C | -8.40146200  | 3.44978600  | -0.17705000 |
| C | -7.11466500  | 2.76131800  | -0.18176900 |
| C | -5.85749700  | -3.55006000 | -0.28977900 |
| C | -5.85453200  | -5.04777000 | -0.32452100 |
| C | -6.28934300  | -5.79254000 | 0.78408000  |
| C | -5.43814500  | 7.04909800  | -1.34791400 |
| C | -6.30288700  | 7.04043400  | 0.90792000  |
| C | -5.41826500  | -5.73495500 | -1.46923200 |
| H | -8.56063100  | -4.62201700 | -0.27689200 |
| H | -10.43048600 | -2.70319100 | -0.13116900 |
| H | -10.42540200 | 2.60088400  | -0.10372100 |
| H | -8.54655100  | 4.51937000  | -0.21992700 |
| H | -6.62082200  | -5.27348200 | 1.67900100  |
| H | -6.63434000  | 7.57490700  | 1.79395000  |
| H | -5.08632200  | -5.17042400 | -2.33593200 |
| N | -4.38609400  | 1.44712200  | -0.32613600 |
| C | -4.61896800  | 2.80511600  | -0.28594500 |
| C | -3.33333900  | 3.43871000  | -0.26957600 |
| C | -2.37449600  | 2.45907600  | -0.30132300 |
| C | -3.03737500  | 1.19221800  | -0.33178000 |
| C | -2.42147400  | -0.07906800 | -0.34269400 |
| C | -3.09157800  | -1.32936900 | -0.34145700 |
| N | -4.44186800  | -1.51517700 | -0.33896600 |
| C | -5.87713100  | 3.43417400  | -0.23609900 |
| C | -5.87676500  | 4.93247300  | -0.23035200 |
| C | -5.44020700  | 5.65285800  | -1.35422300 |
| C | -6.30759100  | 5.64438800  | 0.90119800  |
| H | -6.63852900  | 5.09875100  | 1.78027900  |
| H | -5.11036700  | 5.11446900  | -2.23828400 |

|   |              |             |             |
|---|--------------|-------------|-------------|
| C | -4.61751400  | -2.87512400 | -0.32483900 |
| C | -3.33114200  | -3.56508200 | -0.31305500 |
| C | -2.38008400  | -2.59920300 | -0.32669800 |
| H | -1.30542200  | -2.71600800 | -0.31864600 |
| H | -3.18745300  | -4.63535100 | -0.28525200 |
| C | -6.28549800  | -7.18837600 | 0.74954600  |
| C | -5.41716500  | -7.13055100 | -1.50417800 |
| H | -5.08049200  | -7.64557900 | -2.39967100 |
| H | -6.61883300  | -7.74855500 | 1.61882800  |
| H | -1.30198900  | 2.58573900  | -0.29487300 |
| H | -3.17457900  | 4.50560800  | -0.22866400 |
| H | -5.84767600  | -8.94748100 | -0.42164600 |
| H | -5.86559300  | 8.83331200  | -0.21138000 |
| C | -5.86889500  | 7.74688600  | -0.21677500 |
| C | -5.85015800  | -7.86137600 | -0.39475600 |
| H | -5.11520100  | 0.74133000  | -0.32541500 |
| H | -6.61737600  | -0.85927800 | -0.15737600 |
| H | -5.10240000  | 7.59014800  | -2.22828700 |
| C | 9.19488600   | 0.12812000  | 0.47311200  |
| H | 9.51285900   | 0.06380700  | 1.51977100  |
| H | 9.67216300   | -0.69263500 | -0.07409000 |
| H | 9.57221400   | 1.07151600  | 0.06305000  |
| C | 1.68559900   | 0.00198400  | -0.21144800 |
| C | 0.22189800   | -0.06117300 | -0.29927100 |
| C | -0.99288500  | -0.08202900 | -0.32787000 |
| C | -10.72876100 | -0.02983400 | 0.00113100  |
| C | -11.94579900 | -0.02765600 | 0.07395200  |
| C | -13.36345300 | -0.01876600 | 0.16583600  |
| C | -14.07167600 | 1.20271800  | 0.21231000  |



|   |              |             |            |
|---|--------------|-------------|------------|
| C | -14.08856600 | -1.23081000 | 0.21558200 |
| C | -15.45739300 | 1.21057100  | 0.30642900 |
| H | -13.52312000 | 2.13826700  | 0.17464000 |
| C | -15.47269600 | -1.21503100 | 0.30977700 |
| H | -13.55335800 | -2.17416000 | 0.18047700 |
| C | -16.17074100 | 0.00202800  | 0.35616200 |
| H | -15.99017700 | 2.15403200  | 0.34216100 |
| H | -16.03239900 | -2.14341800 | 0.34915000 |
| C | -17.65092300 | -0.04046300 | 0.45778200 |
| O | -18.31382700 | -1.06323200 | 0.50594700 |
| O | -18.21687300 | 1.18704300  | 0.49280200 |
| H | -19.18149700 | 1.05180700  | 0.55835600 |

---
